# Supplementary material
Source: MDPI journal article supplement (https://www.mdpi.com/2673-4583/5/1/83)
Supplement: s1 [file s1]

# Supplementary Material

for

## Group 14 Metallafluorenes for Lipid Structure Detection and Cellular Imaging

Helena J. Spikes\*, Shelby J. Jarrett-Noland\*, Stephan M. Germann,  
Wendy Olivas, Janet Braddock-Wilking, and Cynthia M. Dupureur

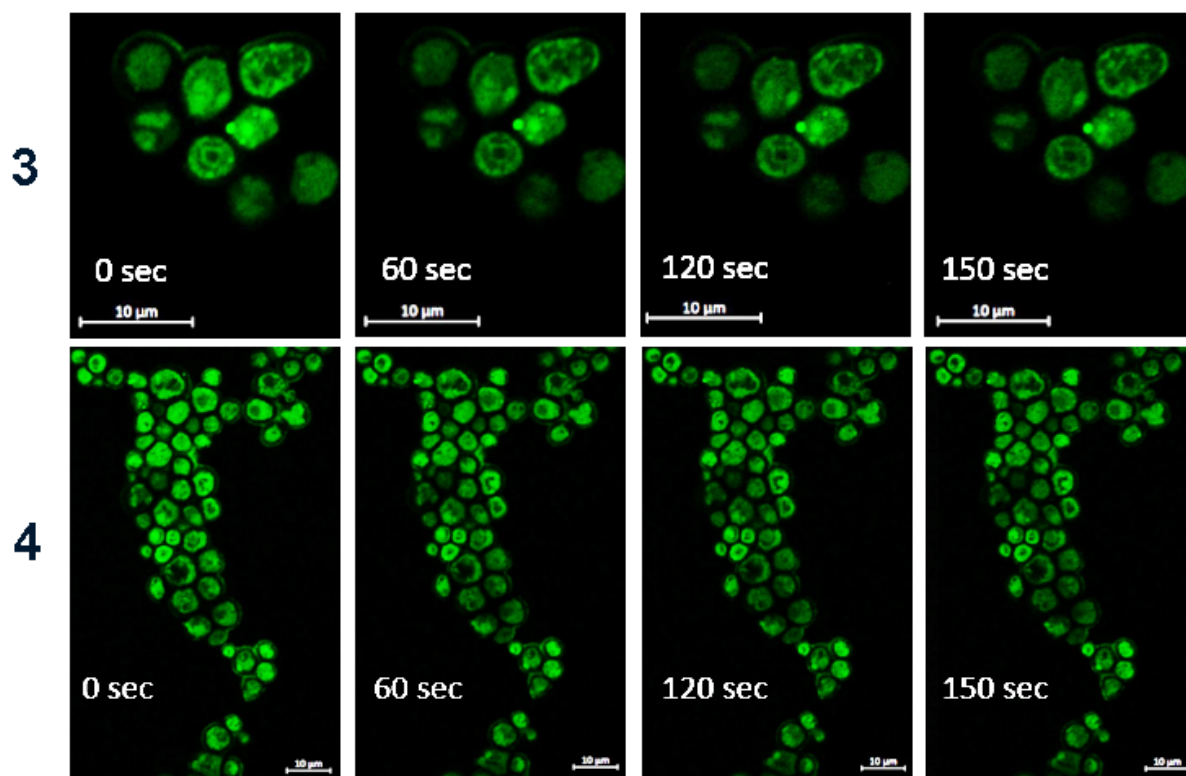

**Figure S1. Photostability of 3 and 4 in Yeast Cells.** See **Methods** for details. *S. cerevisiae* were stained for 15 minutes with 15  $\mu$ M 1 or 2 and then imaged periodically during continuous excitation. Magnification is 63x.

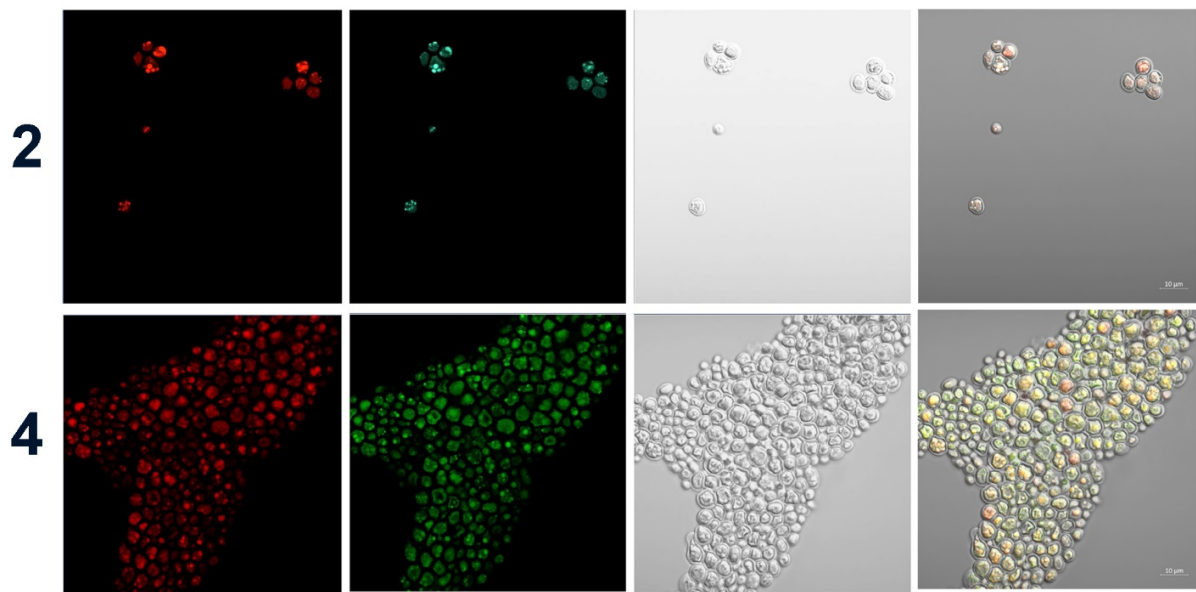

**Figure S2. 2 and 4 Colocalize with Nile Red in Yeast.** Red, Nile Red; green, MF as indicated; third panel, transmitted light; yellow indicates colocalization. Magnification is 63x.
